# Supplementary material for: The Impact of the Coronavirus Pandemic on Vaccination Coverage in Latin America and the Caribbean
Source: MDPI journal article supplement (doi:10.3390/vaccines12050458), 2024-04-25
Supplement: s1 [file s1]

**Supplemental table S1: Data sources and methodology for factors hypothesized to be associated with changes in DTPcv1 and DTPcv3 coverage rates during the coronavirus pandemic, 2019-2021**

| Variable                                   | Data source                                 | Categories                            | Methodology                                                                                                                                                                                                            | Statistical test                  |
|--------------------------------------------|---------------------------------------------|---------------------------------------|------------------------------------------------------------------------------------------------------------------------------------------------------------------------------------------------------------------------|-----------------------------------|
| Vaccine administration in schools          | PAHO/WHO/UNICEF Joint Reporting Form [3]    | 1. Yes<br>2. No                       | Responses to the question “Are any routine doses of vaccines on the national immunization schedule regularly delivered to children at school?” in 2021 were analyzed.                                                  | DTPcv1: t-test<br>DTPcv3: t-test  |
| School closing policies                    | Oxford University COVID Policy Tracker [18] | 1. None or recommended<br>2. Required | Countries were classified as none, recommended, or required based on the number of days in which restrictions were in place in 2020 and 2021. Countries were then divided into two comparable groups.                  | DTPcv1: mw-test<br>DTPcv3: t-test |
| Stay-at-home policies                      | Oxford University COVID Policy Tracker [18] | 1. None or recommended<br>2. Required | Countries were classified as none, recommended, or required based on the number of days in which restrictions were in place in 2020 and 2021. Countries were then divided into two comparable groups.                  | DTPcv1: t-test<br>DTPcv3: t-test  |
| Closing of public transport                | Oxford University COVID Policy Tracker [18] | 1. None<br>2. Recommended or required | Countries were classified as none, recommended, or required based on the number of days in which restrictions were in place in 2020 and 2021. Countries were then divided into two comparable groups.                  | DTPcv1: t-test<br>DTPcv3: mw-test |
| Income group                               | World Bank [19]                             | 1. High-income<br>2. Middle-income    | Countries were divided into two groups using the World Bank’s 2021 classification. High-income countries were classified as high-income. Middle-low and middle-high income countries were classified as middle-income. | DTPcv1: t-test<br>DTPcv3: t-test  |
| Gross domestic product per capita          | Global Health Data Exchange [20]            | 1. High<br>2. Middle<br>3. Low        | Countries were divided into three groups by terciles.                                                                                                                                                                  | DTPcv1: ANOVA<br>DTPcv3: ANOVA    |
| Gini index                                 | World Bank [21]                             | 1. Less unequal<br>2. More unequal    | Countries were divided into two groups by the median.                                                                                                                                                                  | DTPcv1: t-test<br>DTPcv3: mw-test |
| Sustainable Development Index (SDIx) 2021* | PAHO SDIx [22]                              | 1. High<br>2. Middle<br>3. Low        | Countries were divided into three groups by terciles.                                                                                                                                                                  | DTPcv1: ANOVA<br>DTPcv3: ANOVA    |

Mw-test: Mann–Whitney–Wilcoxon test.

\*Data not publicly available.
