# Supplementary material for: The Impact of the Coronavirus Pandemic on Vaccination Coverage in Latin America and the Caribbean
Source: Vaccines (Basel). 2024 Apr 25;12(5):458. doi: 10.3390/vaccines12050458 (PMC11125655; doi:10.3390/vaccines12050458)
Supplement: Supplementary file 1 [file vaccines-12-00458-s001.zip › supplementary_table_S2.xlsx]

## Sheet: supplementary_table_S2
ISO_CODE	COUNTRY_NAME	DTP1_2019	DTP1_2021	DTP1_2021_PRED	CHANGE_DTP1	CHANGE_DTP1_PRED	DTP3_2019	DTP3_2021	DTP3_2021_PRED	CHANGE_DTP3	CHANGE_DTP3_PRED	WB	IHME_GDP	SCHOOL_CLOSING	CLOSE_PUBLIC_TRANSPORT	STAY_AT_HOME	SCHOOL_VAX_STATUS	GINI_INDEX_N_TILE	SDI_N_TILE
VGB	Virgin Islands (British)	94	84	94	-10	-10	88	84	88	-4	-4	High income	High				Yes
VEN	Venezuela	85	73	85	-12	-12	64	56	65	-8	-9		Low	Required	Recommended/Required	Required	Yes		Middle
VCT	St Vincent & The Grenadines	99	91	99	-8	-8	100	92	100	-8	-8	Middle-high income	Middle				Yes		High
URY	Uruguay	100	98	100	-2	-2	94	91	95	-3	-4	High income	High	None/Recommended	Recommended/Required	None/Recommended	No	Less unequal	High
TTO	Trinidad & Tobago	91	95	89	4	6	93	94	91	1	3	High income	High	Required	Recommended/Required	None/Recommended	Yes		High
TCA	Turks and Caicos Islands	92	92	93	0	-1	93	92	93	-1	-1	High income	High				No
SUR	Suriname	93	93	93	0	0	91	86	90	-5	-4	Middle-high income	Middle	Required	None	Required	Yes		Middle
SLV	El Salvador	80	77	79	-3	-2	81	78	81	-3	-3	Middle-low income	Low	Required	None	None/Recommended	Yes	Less unequal	Low
PRY	Paraguay	76	67	75	-9	-8	74	58	73	-16	-15	Middle-high income	Low	Required	None	Required	Yes	Less unequal	Middle
PER	Peru	97	90	97	-7	-7	88	82	86	-6	-4	Middle-high income	Low	Required	Recommended/Required	Required	Yes	Less unequal	Middle
PAN	Panama	100	98	100	-2	-2	88	87	88	-1	-1	High income	High	Required	Recommended/Required	Required	Yes	More unequal	High
NIC	Nicaragua	100	97	100	-3	-3	100	100	100	0	0	Middle-low income	Low	None/Recommended	None	None/Recommended	No	More unequal	Low
MSR	Montserrat	100	96	100	-4	-4	100	100	100	0	0		High				Yes
MEX	Mexico	84	83	82	-1	1	82	78	80	-4	-2	Middle-high income	Middle	Required	Recommended/Required	Required	No	Less unequal	Middle
LCA	St Lucia	100	89	100	-11	-11	92	80	92	-12	-12	Middle-high income	Middle				Yes	More unequal	Low
KNA	St Kitts & Nevis	97	97	98	0	-1	97	96	97	-1	-1	High income	High				Yes		High
JAM	Jamaica	97	93	98	-4	-5	96	90	96	-6	-6	Middle-high income	Low	Required	Recommended/Required	Required	Yes		Low
HTI	Haiti	82	90	80	8	10	66	73	62	7	11	Middle-low income	Low	None/Recommended	None	Required		Less unequal	Low
HND	Honduras	89	82	88	-7	-6	88	77	87	-11	-10	Middle-low income	Low	Required	Recommended/Required	Required	Yes	More unequal	Low
GUY	Guyana	100	98	100	-2	-2	99	98	100	-1	-2	Middle-high income	Middle	Required	None	Required	Yes		Middle
GTM	Guatemala	92	89	92	-3	-3	85	79	85	-6	-6	Middle-high income	Low	Required	Recommended/Required	None/Recommended	No	More unequal	Low
GRD	Grenada	100	84	100	-16	-16	92	77	91	-15	-14	Middle-high income	Middle						Middle
ECU	Ecuador	85	78	85	-7	-7	85	72	85	-13	-13	Middle-high income	Low	Required	Recommended/Required	None/Recommended	No	More unequal	Low
DOM	Dominican Republic	100	99	100	-1	-1	89	84	88	-5	-4	Middle-high income	Middle	Required	Recommended/Required	Required	No	Less unequal	Middle
DMA	Dominica	100	95	100	-5	-5	99	92	98	-7	-6	Middle-high income	Middle	None/Recommended	None	None/Recommended	Yes		Low
CUB	Cuba	100	100	100	0	0	99	100	99	1	1	Middle-high income	Low	Required	Recommended/Required	Required	Yes		High
CRI	Costa Rica	96	88	96	-8	-8	95	93	95	-2	-2	Middle-high income	Middle	Required	None	None/Recommended	Yes	More unequal	Middle
COL	Colombia	95	91	96	-4	-5	94	87	95	-7	-8	Middle-high income	Middle	Required	Recommended/Required	Required	No	More unequal	Middle
CHL	Chile	99	99	99	0	0	96	95	96	-1	-1	High income	High	Required	None	Required	Yes	Less unequal	High
BRB	Barbados	92	83	91	-9	-8	90	82	89	-8	-7	High income	Middle	Required	Recommended/Required	Required	No		High
BRA	Brazil	79	74	76	-5	-2	70	68	65	-2	3	Middle-high income	Middle	Required	Recommended/Required	Required		More unequal	Middle
BOL	Bolivia	81	75	78	-6	-3	75	70	72	-5	-2	Middle-low income	Low	Required	None	Required	Yes	Less unequal	Low
BMU	Bermuda	100	96	100	-4	-4	98	100	100	2	0	High income	High	None/Recommended	None	Required	No
BLZ	Belize	99	80	100	-19	-20	98	83	98	-15	-15	Middle-high income	Low	Required	None	Required	Yes		Low
BHS	Bahamas	91	79	90	-12	-11	89	75	89	-14	-14	High income	High	Required	Recommended/Required	Required	No		High
ATG	Antigua and Barbuda	100	93	100	-7	-7	99	92	100	-7	-8	High income	High				Yes		High
ARG	Argentina	87	88	86	1	2	83	81	82	-2	-1	Middle-high income	Middle	Required	Recommended/Required	Required	Yes	Less unequal	High
AIA	Anguilla	79	88	75	9	13	77	79	72	2	7		High				Yes
ABW	Aruba	99	98	99	-1	-1	96	93	96	-3	-3	High income	High	None/Recommended	None	None/Recommended	Yes
